# Supplementary material for: Delving into guest-free and He-filled sI and sII clathrate hydrates: a first-principles computational study
Source: Royal Society of Chemistry journal article supplement (doi:10.1039/d2cp00701k), 2022-01-01
Supplement: d2cp00701k1.pdf [file d2cp00701k1.pdf]

# **Delving into guest-free and He-lled sI and sII clathrate hydrates: a first-principles computational study**

Raquel Yanes-Rodríguez<sup>1,a</sup>, Adriana Cabrera-Ramirez<sup>1,a</sup>, and Rita Prosimi<sup>1\*</sup>

<sup>1</sup>*Institute of Fundamental Physics (IFF-CSIC), CSIC, Serrano 123, 28006 Madrid, Spain*

E-mail: \*rita@iff.csic.es;Phone:+34-91-5616800Ext.941131

---

<sup>a</sup>Doctoral Programme in Theoretical Chemistry and Computational Modelling, Doctoral School, Universidad Autónoma de Madrid

## Supplementary material

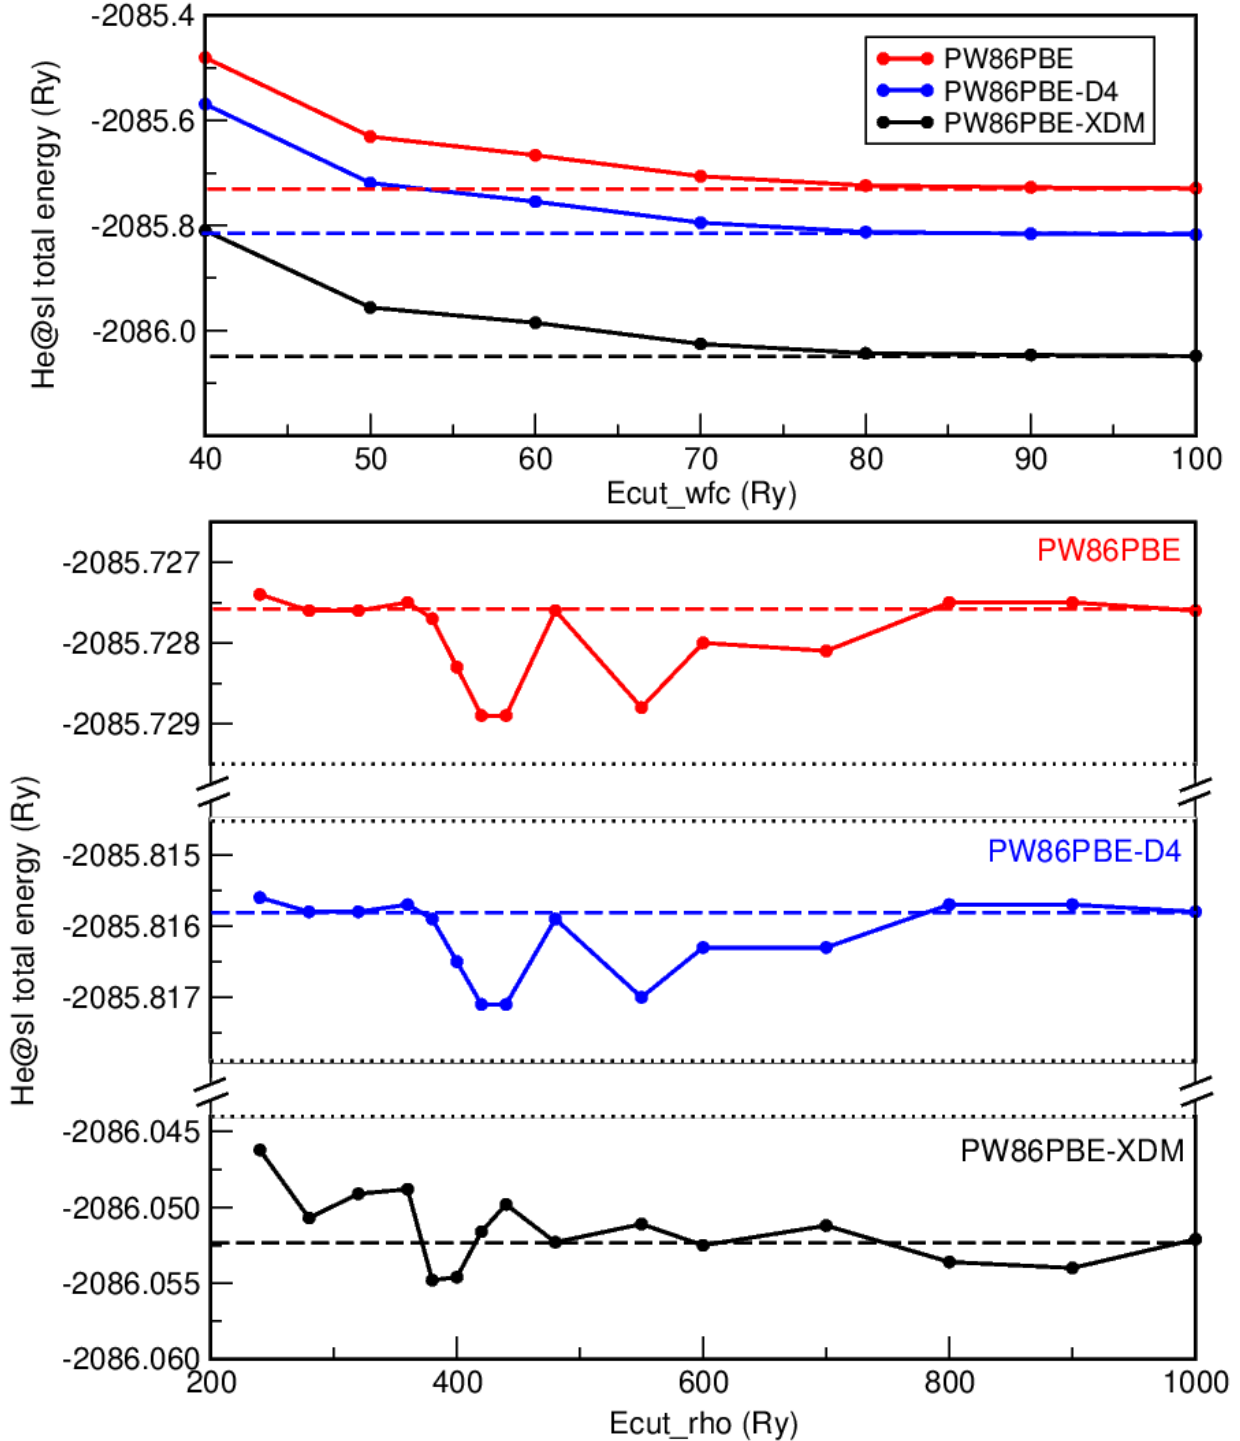

Figure S1: Convergence of He@sI total energies (in Ry) vs the energy cutoff for the plane-wave expansion of the wavefunctions  $E_{\text{cut\_wfc}}$  and charge density  $E_{\text{cut\_rho}}$  (in Ry) obtained from single point calculations considering the PW86PBE and PW86PBE-XDM/D4 functionals.

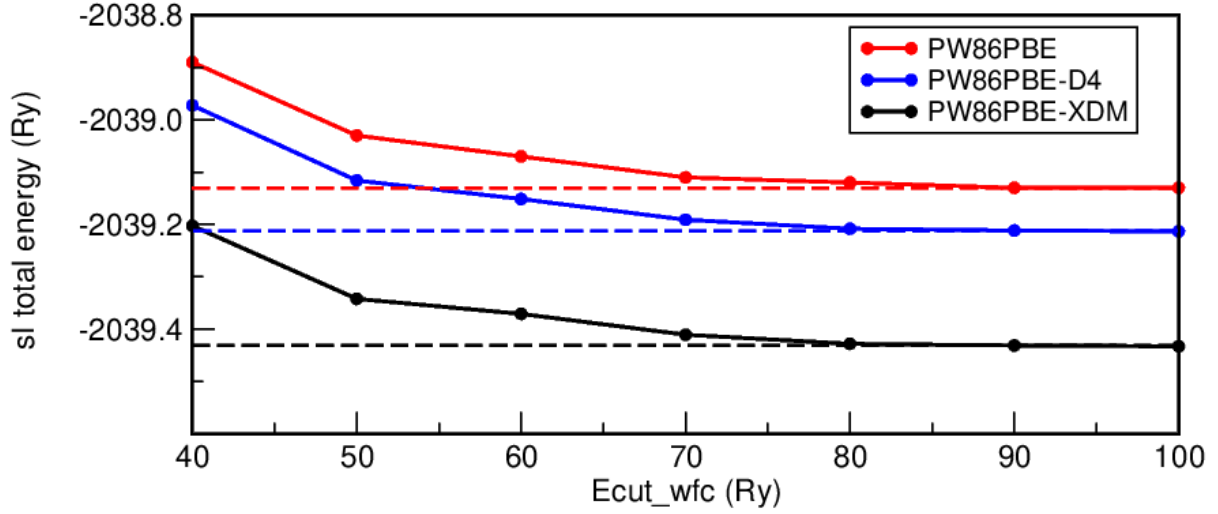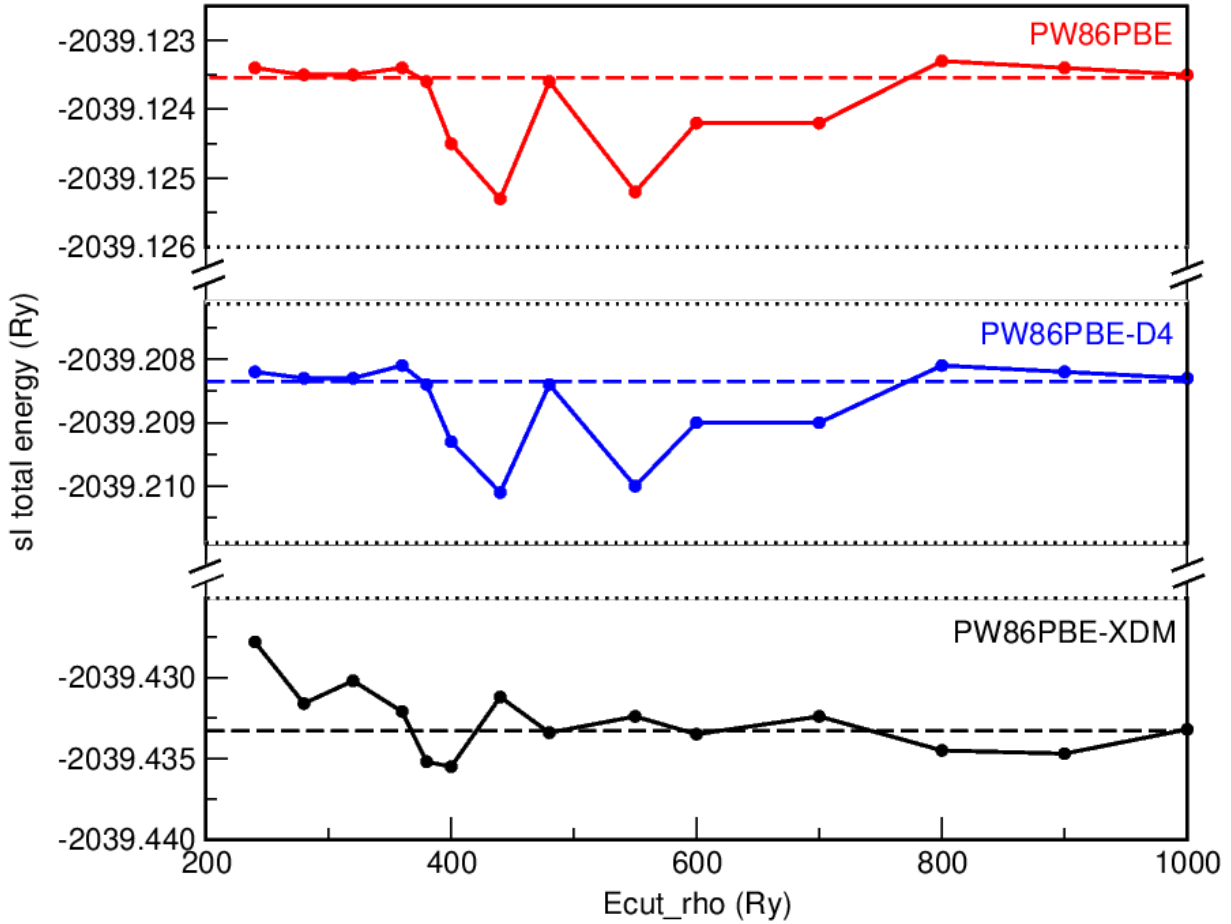

Figure S2: Convergence of sI total energies (in Ry) vs the energy cutoff for the plane-wave expansion of the wavefunctions  $E_{\text{cut\_wfc}}$  and charge density  $E_{\text{cut\_rho}}$  (in Ry) obtained from single point calculations considering the PW86PBE and PW86PBE-XDM/D4 functionals.

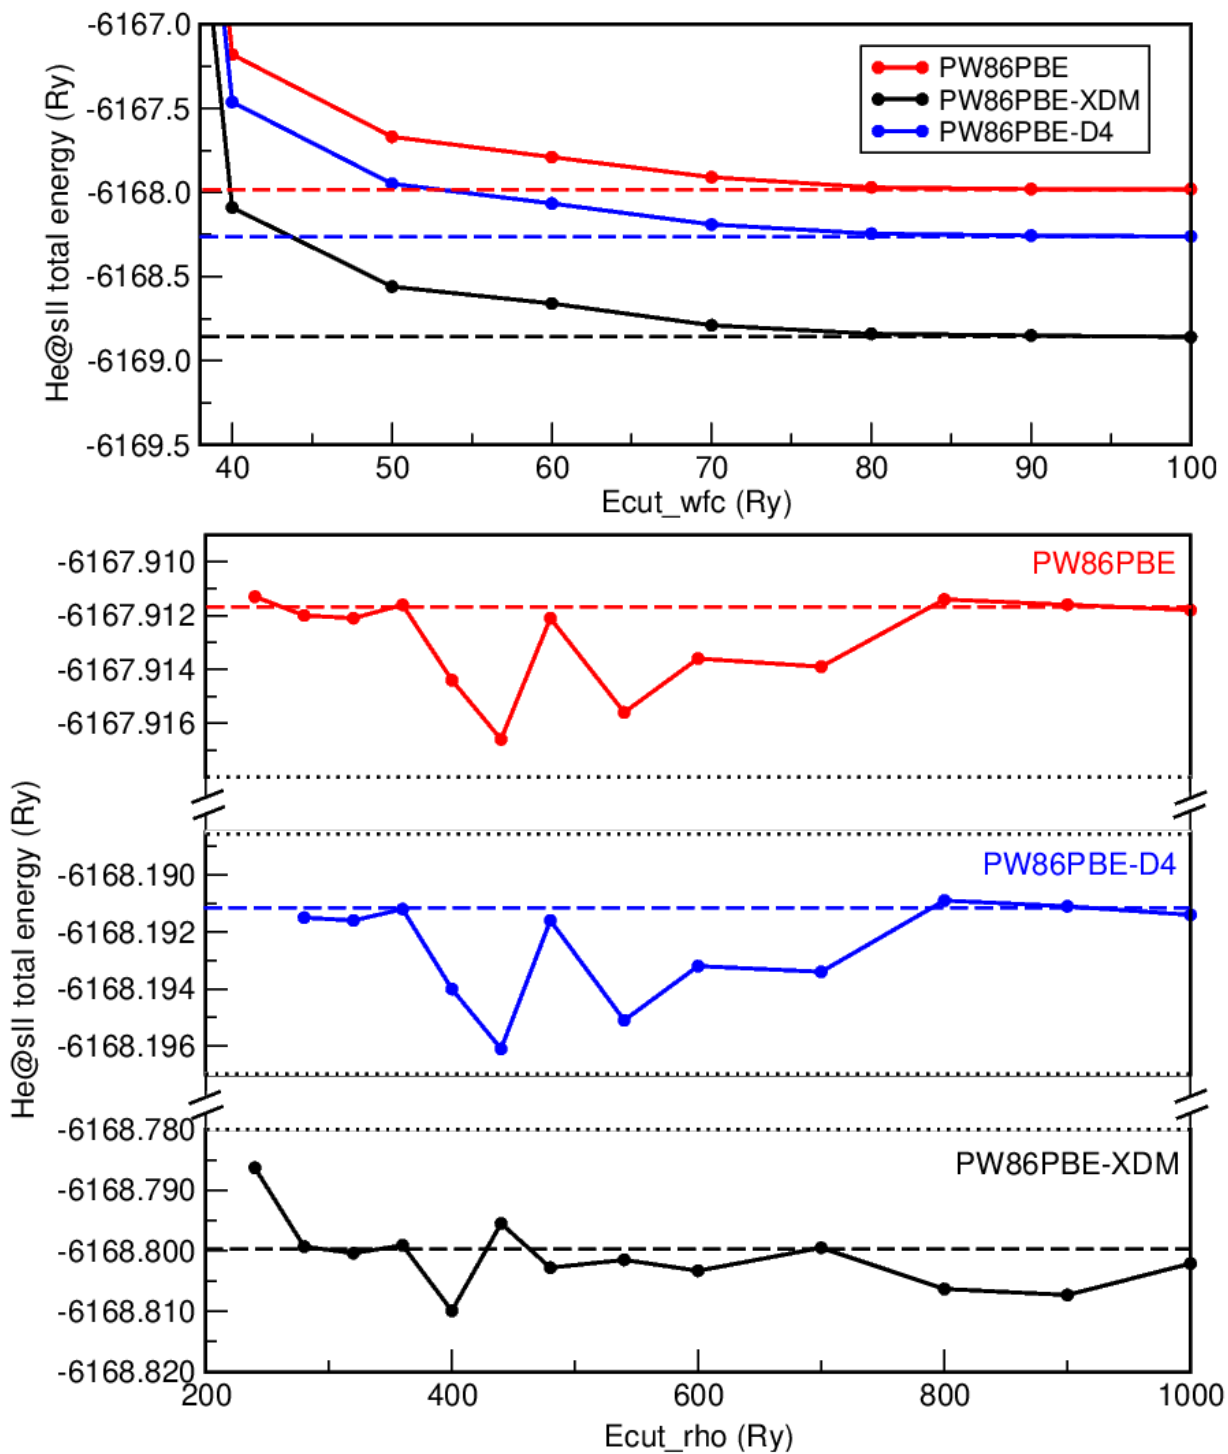

Figure S3: Convergence of He@sII total energies (in Ry) vs the energy cutoff for the plane-wave expansion of the wavefunctions  $E_{\text{cut\_wfc}}$  and charge density  $E_{\text{cut\_rho}}$  (in Ry) obtained from single point calculations considering the PW86PBE and PW86PBE-XDM/D4 functionals.

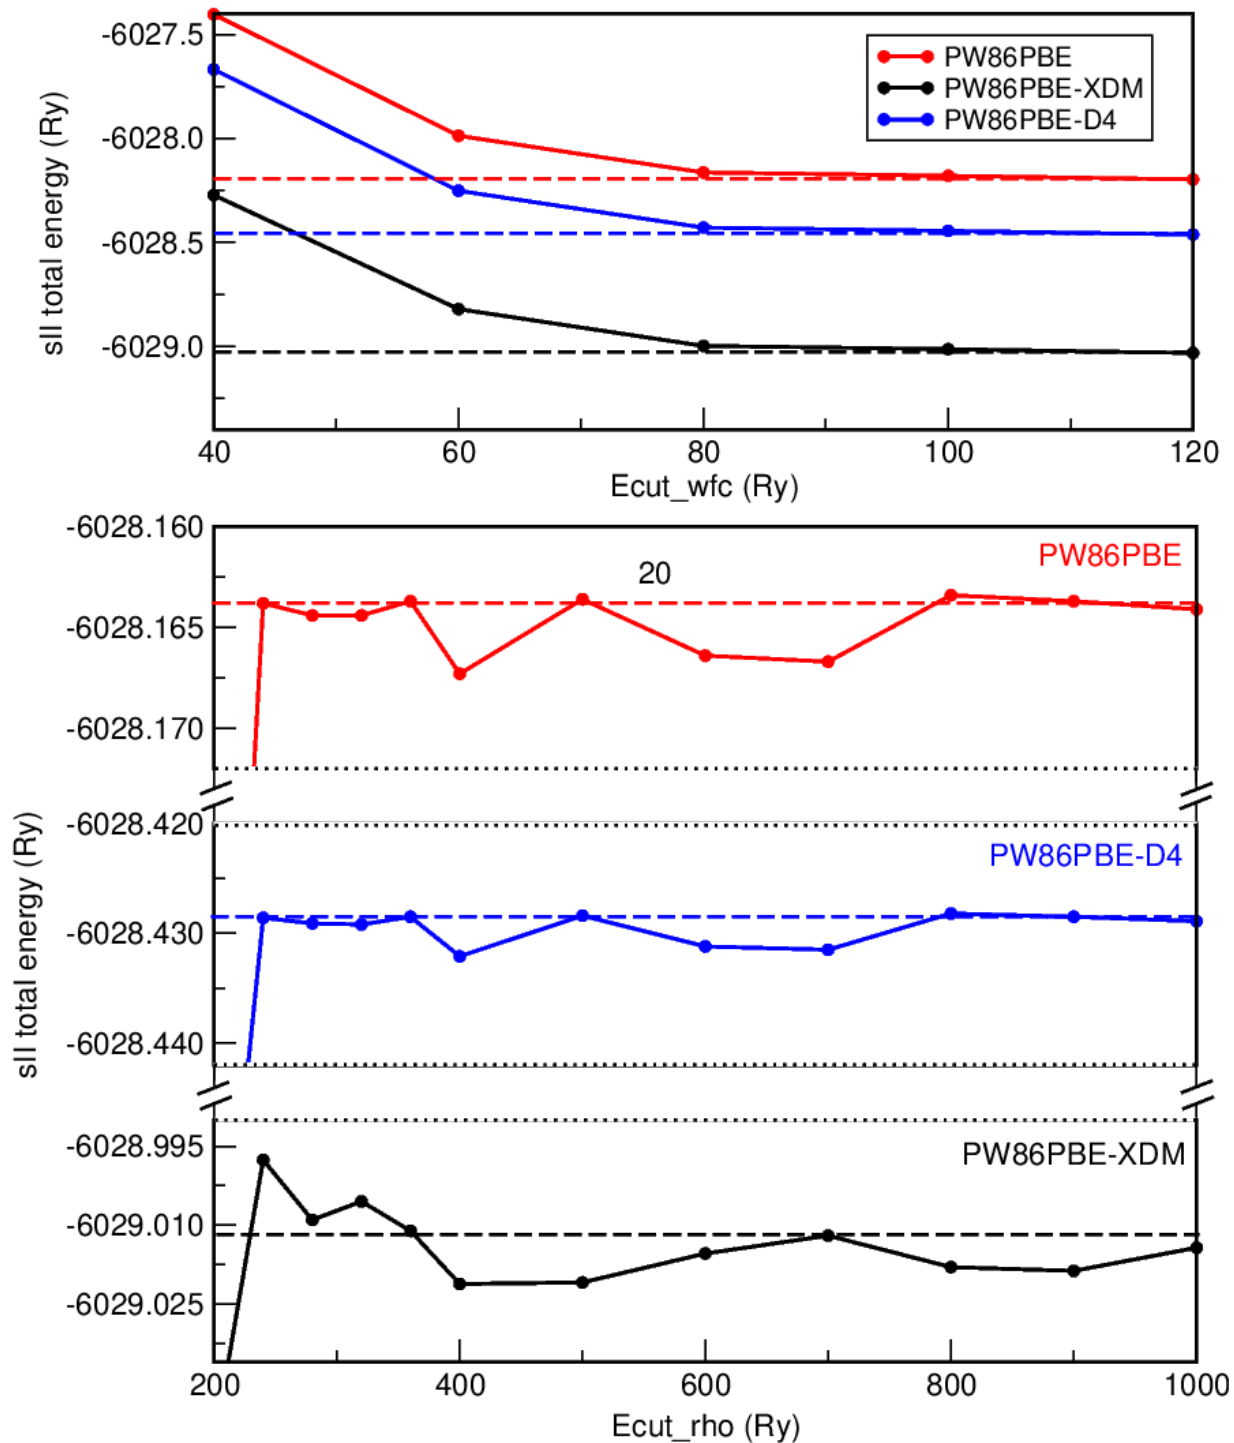

Figure S4: Convergence of sII total energies (in Ry) vs the energy cutoff for the plane-wave expansion of the wavefunctions Ecut\_wfc and charge density Ecut\_rho (in Ry) obtained from single point calculations considering the PW86PBE and PW86PBE-XDM/D4 functionals.

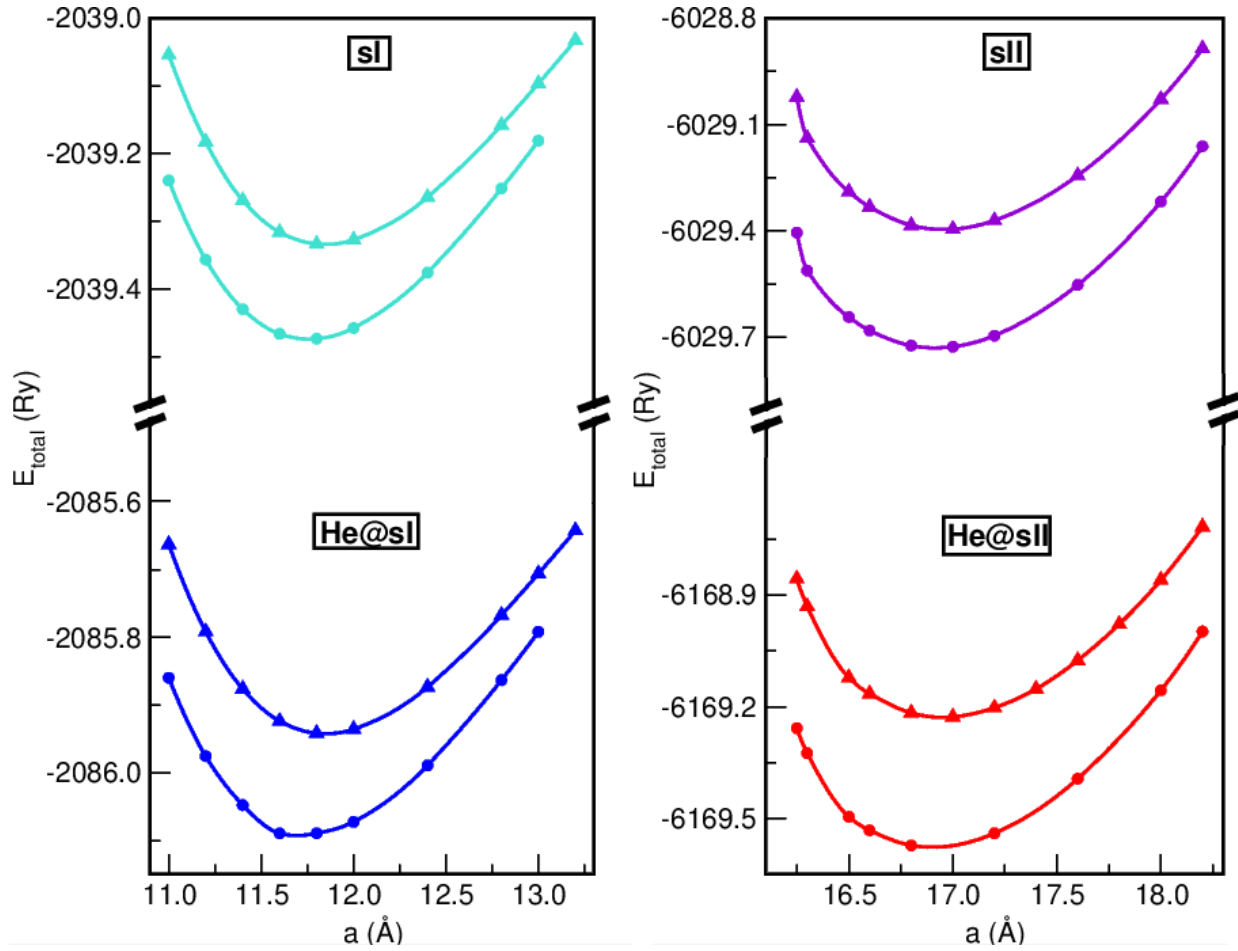

Figure S5: Total energies (in Ry) of the fully occupied He@sI clathrate and the empty sI hydrate (left panel), and of the fully occupied He@sII clathrate and the empty sII hydrate (right panel), as a function of the lattice constant  $a$  (in Å). Solid lines correspond to the MEOS fits.

**Table S1: Cohesive energies per water molecule (in kcal/mol) (see Fig. 2) corresponding to PW86PBE-XDM computations for the He-filled and empty sI/sII unit cells as a function of the lattice parameter,  $a$ .**

| He@sI           |                                   | sI              |                                   | He@sII          |                                   | sII             |                                   |
|-----------------|-----------------------------------|-----------------|-----------------------------------|-----------------|-----------------------------------|-----------------|-----------------------------------|
| $a(\text{\AA})$ | $\Delta E_{coh}(\text{kcal/mol})$ |
| 11.0            | -14.80                            | 11.0            | -14.69                            | 16.25           | -15.59                            | 16.25           | -15.49                            |
| 11.2            | -15.60                            | 11.2            | -15.48                            | 16.3            | -15.75                            | 16.3            | -15.74                            |
| 11.4            | -16.09                            | 11.4            | -15.98                            | 16.4            | -15.87                            | 16.35           | -15.69                            |
| 11.6            | -16.37                            | 11.6            | -16.23                            | 16.5            | -16.14                            | 16.4            | -15.77                            |
| 11.8            | -16.37                            | 11.8            | -16.28                            | 16.6            | -16.23                            | 16.5            | -16.04                            |
| 12.0            | -16.26                            | 12.0            | -16.17                            | 16.8            | -16.32                            | 16.6            | -16.12                            |
| 12.4            | -15.69                            | 12.4            | -15.62                            | 17.2            | -16.25                            | 16.8            | -16.22                            |
| 12.8            | -14.83                            | 12.8            | -14.77                            | 17.6            | -15.91                            | 17.0            | -16.23                            |
| 13.0            | -14.34                            | 13.0            | -14.29                            | 18.0            | -15.36                            | 17.2            | -16.16                            |
|                 |                                   |                 |                                   | 18.2            | -15.00                            | 17.6            | -15.83                            |
|                 |                                   |                 |                                   |                 |                                   | 18.0            | -15.29                            |
|                 |                                   |                 |                                   |                 |                                   | 18.2            | -14.93                            |

**Table S2: Cohesive energies per water molecule (in kcal/mol) (see Fig. 2) corresponding to PW86PBE-D4 computations for the He-filled and empty sI/sII unit cells as a function of the lattice parameter,  $a$ .**

| He@sI           |                                   | sI              |                                   | He@sII          |                                   | sII             |                                   |
|-----------------|-----------------------------------|-----------------|-----------------------------------|-----------------|-----------------------------------|-----------------|-----------------------------------|
| $a(\text{\AA})$ | $\Delta E_{coh}(\text{kcal/mol})$ |
| 11.0            | -13.59                            | 11.0            | -13.55                            | 16.25           | -14.79                            | 16.25           | -14.73                            |
| 11.2            | -14.46                            | 11.2            | -14.42                            | 16.3            | -14.96                            | 16.3            | -15.00                            |
| 11.4            | -15.04                            | 11.4            | -15.01                            | 16.5            | -15.41                            | 16.35           | -14.97                            |
| 11.6            | -15.37                            | 11.6            | -15.33                            | 16.6            | -15.51                            | 16.4            | -15.06                            |
| 11.8            | -15.49                            | 11.8            | -15.45                            | 16.8            | -15.62                            | 16.5            | -15.35                            |
| 12.0            | -15.45                            | 12.0            | -15.41                            | 17.0            | -15.65                            | 16.6            | -15.45                            |
| 12.4            | -15.02                            | 12.4            | -14.98                            | 17.2            | -15.59                            | 16.8            | -15.57                            |
| 12.8            | -14.30                            | 12.8            | -14.26                            | 17.4            | -15.48                            | 17.0            | -15.59                            |
| 13.0            | -13.88                            | 13.0            | -13.84                            | 17.6            | -15.30                            | 17.2            | -15.54                            |
| 13.2            | -13.45                            | 13.2            | -13.40                            | 18.0            | -14.80                            | 17.6            | -15.24                            |
|                 |                                   |                 |                                   | 18.2            | -14.47                            | 18.0            | -14.75                            |
|                 |                                   |                 |                                   |                 |                                   | 18.2            | -14.42                            |
